# Supplementary material for: Large-Scale Phylogenetic Classification of Fungal Chitin Synthases and Identification of a Putative Cell-Wall Metabolism Gene Cluster in Aspergillus Genomes
Source: PLoS One. 2014 Aug 22;9(8):e104920. doi: 10.1371/journal.pone.0104920 (PMC4141765; doi:10.1371/journal.pone.0104920)
Supplement: Table S4 — 34 Chsp from Uniprot database specifying name, accession, and class. (XLSX) [file pone.0104920.s015.xlsx]

## Sheet: Hoja1
Species	Accession	Class
Drosophila melanogaster	Q9GTZ7	outgroup
Lucilia cuprina	Q9GU17	outgroup
Aedes aegypti	Q9NHE6	outgroup
Dirofilaria immitis	Q9GQ90	outgroup
Aspergillus oryzae	BAB85684	I
Arthroderma benhamiae	BAB17766	I
Exophiala dermatitidis	AAC34496	I
Ericoid mycorrhizal	CAC95227	II
Fusarium oxysporum	AAT77182	II
Paracoccidiodes brasiliensis	CAA70433	II
Parastagonospora nodorum	CAB41508	II
Aspergillus fumigatus	AAB07678	III
Aspergillus oryzae	AAK31732	III
Botryotinia fuckeliana	AAM14606.1	III
Emericella nidulans	BAA11845	III
Penicillium chrysogenum	AAF04828.1	III
Botryotinia fuckeliana	AAF19527.2	IV
Exophiala dermatitidis	AAD28744.1	IV
Paracoccidiodes brasiliensis	AAD19614	IV
Tuber magnatum	CAB41410	IV
Aspergillus oryzae	BAB88128	V
Blumeria graminis	AAF04279.2	V
Exophiala dermatitidis	AAL79830.2	V
Emericella nidulans	BAA21714	V
Glomerella graminicola	AAL23719	V
Aspergillus fumigatus	AAB60781	VI
Gibberella zeae	EAA68845	VI
Magnaphorte grisea	EAA52936	VI
Neurospora crassa	XP_324625	VI
Aspergillus oryzae	BAB88127	VII
Botryotinia fuckeliana	AAS21657	VII
Glomerella graminicola	AAL55424	VII
Neurospora crassa	XP_323703	VII
Paracoccidiodes brasiliensis	AAD19613	VII
