# Supplementary material for: Large-Scale Phylogenetic Classification of Fungal Chitin Synthases and Identification of a Putative Cell-Wall Metabolism Gene Cluster in Aspergillus Genomes
Source: PLoS One. 2014 Aug 22;9(8):e104920. doi: 10.1371/journal.pone.0104920 (PMC4141765; doi:10.1371/journal.pone.0104920)
Supplement: Table S7 — Putative Chsp clade groupings by five phylogenetic methods, using only the canonical conserved motifs. The squares represent monophyletic clade, triangles paraphyletic groupings, and circles polytomies. (XLSX) [file pone.0104920.s018.xlsx]

## Sheet: Hoja1
Methods	Clades	Division I	Division II	Subclades	Ascomycota	Basidyomicota	Mucoromycotina	Chytridiomycota	Microsporidia
NJ	ChspI	■		2	■	■
	ChspII	■		5	■■	■■	■
	ChspIII	■		2	■	■
	ChspIV	■		8	■	■■	■■■	■	■
	ChspV		●	5	■	■■	■■
	ChspVI	■		1	■
	ChspVII		●	2	■	■
ME	ChspI	■		2	■	■
	ChspII	▲		4	■■	■ ■	■
	ChspIII	■		2	■	■
	ChspIV	■		8	■	■■	■■■	■	■
	ChspV		■	3	■	■	■
	ChspVI			1	■
	ChspVII		■	3	■	■		■
MP	ChspI	■		2	■	■
	ChspII	▲		4	■	■	■■
	ChspIII	●		5	■●●●	■
	ChspIV		■	8	■	■■	■■■	■	■
	ChspV		■	3	■	■	■
	ChspVI		■	1	■
	ChspVII		■	2	■	■
ML	ChspI	■		3	■		■■
	ChspII	■		4	■	■■■
	ChspIII	■		2	■	■
	ChspIV		■	6	■	■■	■■■
	ChspV		▲	3	■■■
	ChspVI	■		1	■
	ChspVII		■	2	■	■
Bayesian	ChspI	■		1	■
	ChspII	■		2	■	■
	ChspIII	■		3	■■	■
	ChspIV		■	10	■	■■	■■■■■■		■
	ChspV		■	2	■	■
	ChspVI	■		2	■	■
	ChspVII		■	2	■	■
